# Supplementary material for: Sequestration of the exocytic SNARE Psy1 into multiprotein nodes reinforces polarized morphogenesis in fission yeast
Source: PubMed Central journal article supplement — Mol Biol Cell. 2021 Oct 1;32(20):ar7. doi: 10.1091/mbc.E20-05-0277 (PMC8684755; doi:10.1091/mbc.e20-05-0277), 2021-10-01
Supplement: mbc-32-ar7-s001.pdf [file mbc-32-ar7-s001.pdf]

# Supplemental Materials

*Molecular Biology of the Cell*

Miller *et al.*

## SUPPLEMENTAL FIGURE LEGENDS:

### Figure S1: Skb1-Slf1-Psy1 nodes are stable after treatment with 1,6-hexanediol.

(A) WT cells expressing P-body marker Sts5-GFP grown to saturation and then treated with 10% 1,6-hexanediol or DMSO control. (B) *GFP-psy1 mCherry-slf1* cells were treated with 10% 1,6-hexanediol or DMSO control. Images (right) are close ups of the white boxed region showing intact Skb1-Slf1-Psy1 nodes. Maximum intensity projections were created from the top half of cell z-stack images that encompass one side of the cell membrane. Bars, 4 $\mu$ m.

### Figure S2: Genetic interactions between node mutants and exocytosis mutants. (A)

Table summarizing growth of indicated single or double mutants shown below. Red shaded rows indicate temperature sensitive growth with double mutants compared to single mutants. Green shaded rows indicate growth suppression with double mutants. (B) The indicated strains were spotted with 10 $\times$  serial dilutions onto YE4S or YE4S + 0.5M KCl plates. Plates incubated for 2-4 days prior to imaging.

### Figure S3: Additional analysis of Skb1-Slf1-Psy1 nodes with Rga4 and Rga6 GAPs. (A)

Localization of Rga4-mNG (Left) or Rga6-GFP (Right) and mCherry-Slf1 in WT cells. Representative images with boxed region of close-up of mCherry and GFP node signals (Right panels) are shown.

### Figure S4: Psy1 domain deletion analysis. (A) Diagram of Psy1 protein domains (top).

Regions included in each psy1 domain mutant is shown (below). (B) Co-localization of mCherry-Slf1 with each GFP-tagged psy1 domain mutant as listed. Images are maximum projections from z-series except for brightfield images which are single middle z-plane images.

### Figure S5: Additional characterization of GFP-tagged psy1 mutants. (A) Note the

absence of nodes in GFP-psy1-Ha-m1 and GFP-psy1-Hc-m1 cells. psy1-Hc-m1 also localizes to internal puncta. Single middle z-slice images are shown. Bar, 7 $\mu$ m. (B) Normalized global intensity (mean  $\pm$  SD) of GFP-Psy1 in indicated strains. \* $p < 0.05$ ; \*\*  $p < 0.0003$ ; and  $p^{***} < 0.0001$  determined by ANOVA.  $n > 100$  for each cell type.

### Figure S6: Nodes remain intact in psy1-Ha-m1 mutant. (A) Co-localization of mCherry-

Slf1 with GFP-tagged Psy1, psy1-Ha-m1, or psy1-Ha-m2. Images are maximum projections from z-series except for brightfield images which are single middle z-plane images. (B) Average number of mCherry-Slf1 nodes per cell of indicated cell type (mean  $\pm$  SD). No significant difference among strains determined by ANOVA.  $n > 75$  for each cell type. (C) Average mCherry-Slf1 node intensity per cell of indicated strains. mean  $\pm$  SD shown. No significant difference among strains determined by ANOVA.  $n > 75$  for each cell type.

# Supplemental figure 1

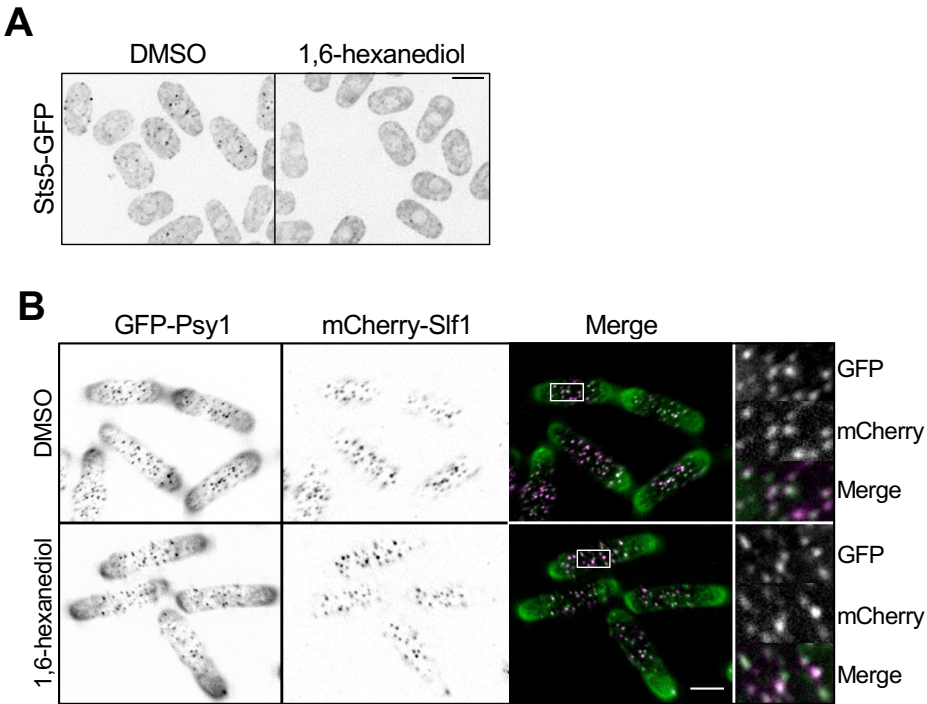

# Supplemental figure 2

**A**

Growth on YE4S plates

|               | Single mutant | with <i>skb1Δ</i> | with <i>slf1Δ</i> |
|---------------|---------------|-------------------|-------------------|
| <i>exo70Δ</i> | Δ             | -                 | -                 |
| <i>for3Δ</i>  | Δ             | -                 | -                 |
| <i>sec3-2</i> | Δ             | ++                | Δ                 |
| <i>sec8-1</i> | Δ             | ++                | ++                |
| <i>rho3Δ</i>  | Δ             | ++                | ++                |

Δ, typical growth of single mutant

++, enhanced growth

-, reduced growth

**B**

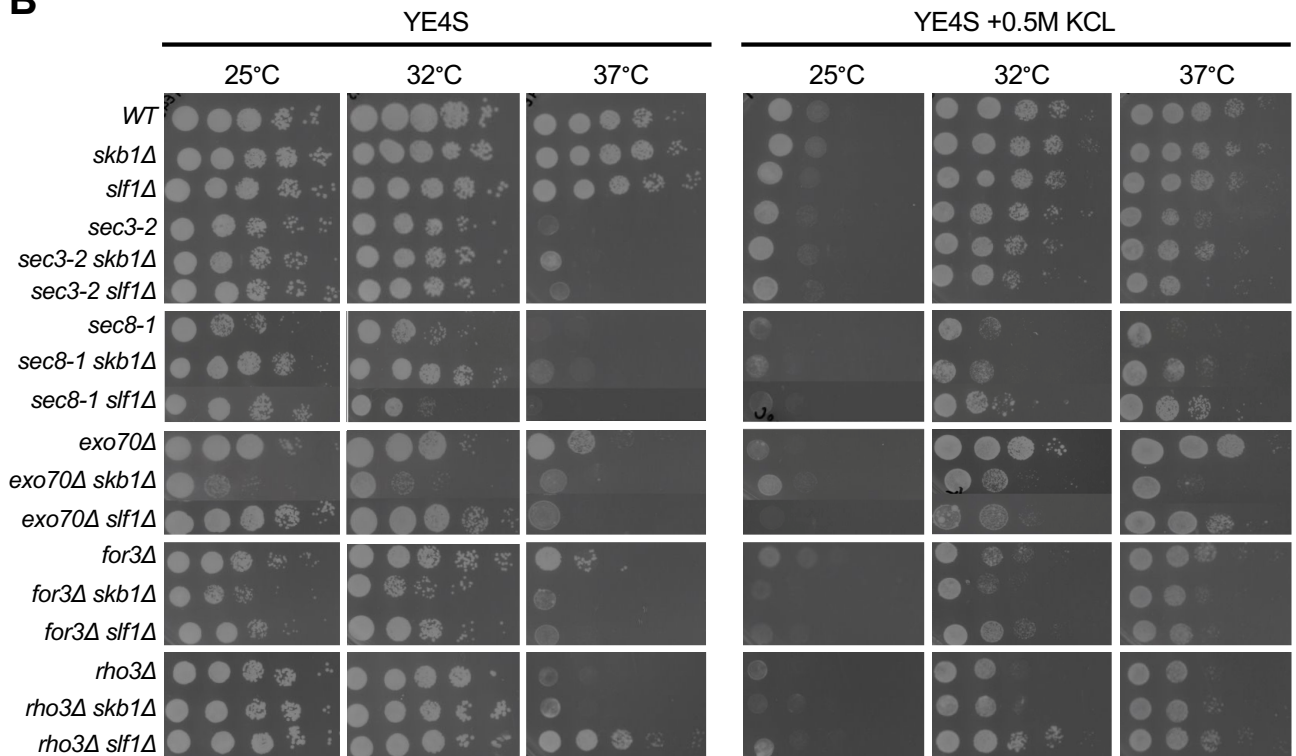

# Supplemental figure 3

**A**

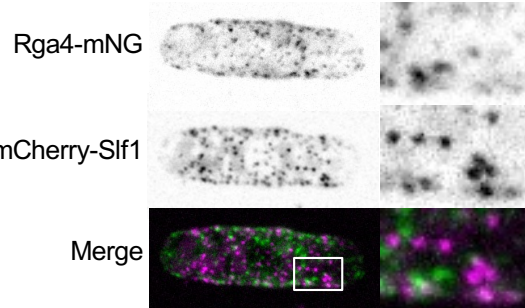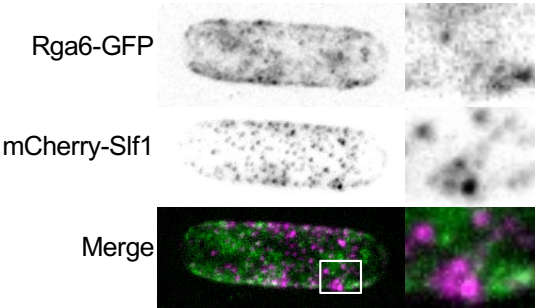

# Supplemental figure 4

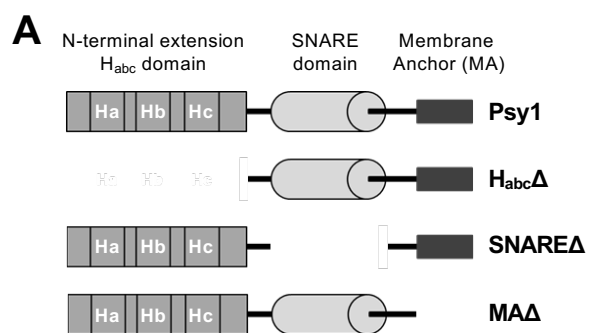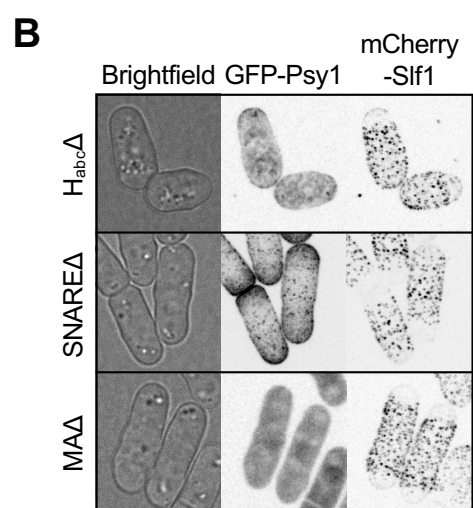

# Supplemental figure 5

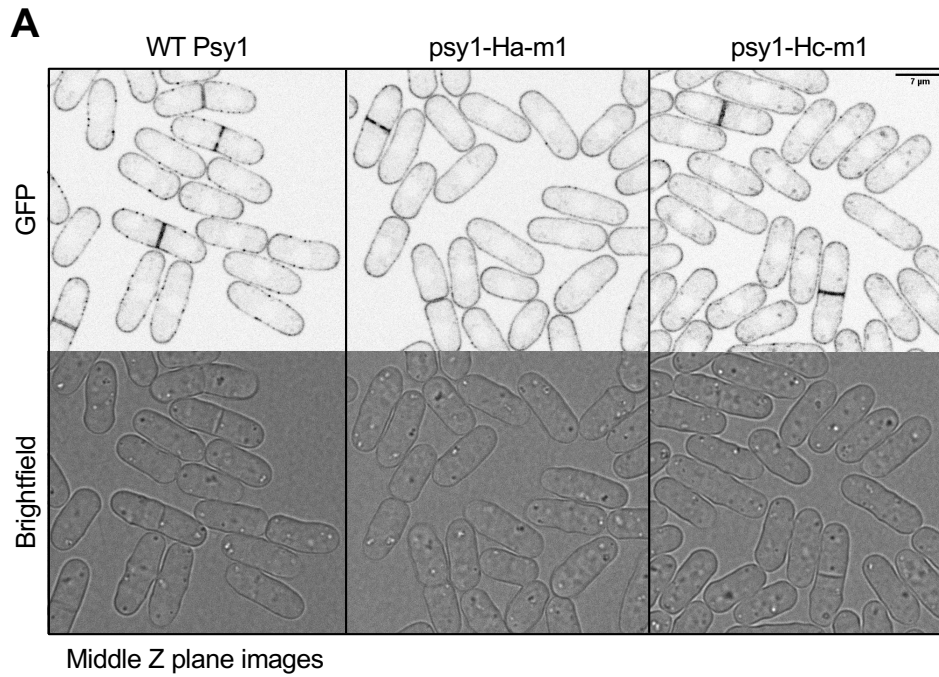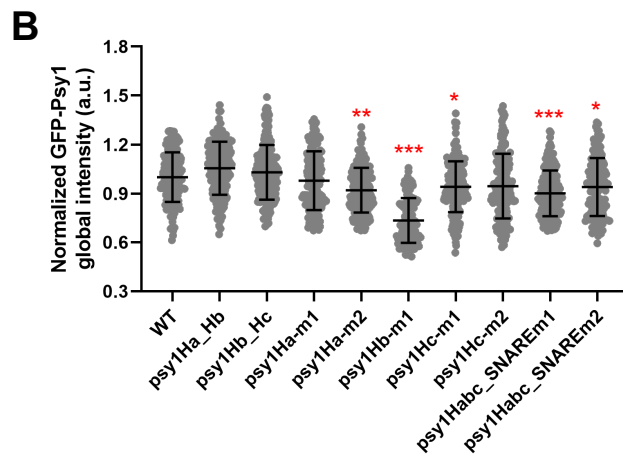

# Supplemental figure 6

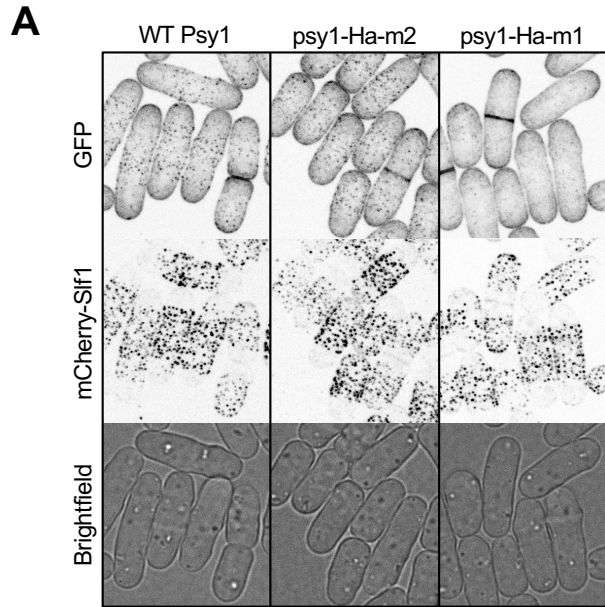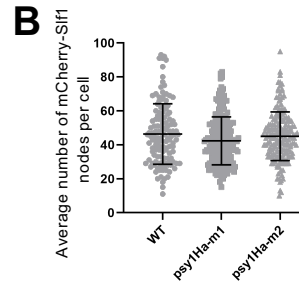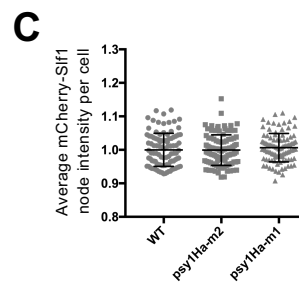



**Table S1. Yeast strains used in this study**

| Strain | Genotype                                                              | Source                         |
|--------|-----------------------------------------------------------------------|--------------------------------|
| JM6543 | <i>pAct1-Lifeact-mCherry::leu+ GFP-psy1::kanMX6</i>                   | This Study                     |
| JM4209 | <i>GFP-psy1::kanMX6 mCherry-slf1::kanMX6</i>                          | This Study                     |
| JM4497 | <i>GFP-psy1::kanMX6 mCherry-slf1::kanMX6 skb1Δ::natR</i>              | This Study                     |
| JM4207 | <i>GFP-Psy1::kanMX6 skb1 Δ::natR</i>                                  | Lab collection                 |
| JM4467 | <i>GFP-psy1::kanMX6 slf1Δ::hphR</i>                                   | This Study                     |
| JM4200 | <i>GFP-psy1::kanMX6</i>                                               | This Study                     |
| JM2325 | <i>skb1-GFP::kanMX6 h-</i>                                            | Lab collection                 |
| JM1801 | <i>slf1-GFP::kanMX6 h+</i>                                            | Lab collection                 |
| JM366  | 972 <i>h-</i>                                                         | Lab collection                 |
| JM906  | <i>skb1 Δ::kanMX6 h+</i>                                              | Lab collection                 |
| JM909  | <i>skb1 Δ::ura4+ ura4-D18 leu1-32</i>                                 | Lab collection                 |
| JM656  | <i>sec8-1 ura4- D18 leu1-32 h+</i>                                    | Lab collection                 |
| JM1449 | <i>exo70::kanMX6 ura4- D18 leu1-32 ade6-M21X h+</i>                   | Lab collection                 |
| JM665  | <i>for3Δ::kanMX6 ura4-D18 leu1-32 ade6-M21X h+</i>                    | Lab collection                 |
| JM6226 | <i>sec3-2-his5+-ura+ ade6- leu1- ura4D-18 h-</i>                      | (Bendezú <i>et al.</i> , 2012) |
| JM6256 | <i>rho3Δ::kanMX6 h-</i>                                               | This Study                     |
| JM6057 | <i>skb1 Δ::kanMX6 exo70Δ::kanMX6 ura4-D18</i>                         | This Study                     |
| JM6262 | <i>skb1Δ::kanMX6 for3Δ::kanMX6 ura4-D18 h-</i>                        | This Study                     |
| JM6113 | <i>skb1Δ::kanMX6 sec8-1 ura4-D18 leu1-32 h-</i>                       | This Study                     |
| JM6313 | <i>rho3Δ::kanMX6 skb1Δ::natR h+</i>                                   | This Study                     |
| JM6374 | <i>sec3-2-his5+-ura+ skb1Δ::natR ura4-D18 h-</i>                      | This Study                     |
| JM6112 | <i>slf1Δ::hphR h-</i>                                                 | This Study                     |
| JM6127 | <i>slf1Δ::hphR exo70Δ::kanMX6 h-</i>                                  | This Study                     |
| JM6264 | <i>slf1Δ::hphR for3Δ::kanMX6 h-</i>                                   | This Study                     |
| JM6330 | <i>slf1Δ::hphR rho3Δ::kanMX6 h-</i>                                   | This Study                     |
| JM6357 | <i>slf1Δ::hphR sec8-1 ura4-D18 leu1-32 h+</i>                         | This Study                     |
| JM6420 | <i>slf1Δ::kanMX6 sec3-2-his5+-ura4+ ura4-D18 leu1-32</i>              | This Study                     |
| JM6211 | <i>bgs4Δ::ura4+ Pbgs1+::GFP-bgs4+:leu1+ skb1Δ::NAT h+</i>             | This Study                     |
| JM4011 | <i>leu1-32 ura4-18 his3-1 bgs4Δ::ura4+ Pbgs1+::GFP-bgs4+:leu1+ h-</i> | (Cortes <i>et al.</i> , 2005)  |
| JM6210 | <i>bgs4Δ::ura4+ Pbgs1+::GFP-bgs4+:leu1+ slf1Δ::kanMX6 h+</i>          | This Study                     |
| JM6061 | <i>slf1Δ::kanMX6 sec8-mNeonGreen::hphR h+</i>                         | This Study                     |
| JM6838 | <i>slf1Δ::hphR for3Δ::kanMX6 sec8-mNeonGreen::hphR h+</i>             | This Study                     |
| JM6802 | <i>slf1Δ::hphR rga4Δ::kanMX6 rga6Δ::Kan sec8-mNeonGreen::hphR h-</i>  | This Study                     |

|               |                                                                                                                                       |            |
|---------------|---------------------------------------------------------------------------------------------------------------------------------------|------------|
| <b>JM6087</b> | <i>sec8-mNeonGreen::hphR h+</i>                                                                                                       | This Study |
| <b>JM6398</b> | <i>skb1Δ::natR sec8-mNeonGreen::hphR</i>                                                                                              | This Study |
| <b>JM6641</b> | <i>skb1Δ::natR for3Δ::kanMX6 sec8-mNeonGreen::hphR h+</i>                                                                             | This Study |
| <b>JM6643</b> | <i>for3Δ::kanMX6 sec8-mNeonGreen::hphR h+</i>                                                                                         | This Study |
| <b>JM6669</b> | <i>rga4Δ::kanMX6 rga6Δ::kanMX6 sec8-mNeonGreen::hphR h+</i>                                                                           | This Study |
| <b>JM6671</b> | <i>skb1Δ::nat rga4Δ::kanMX6 rga6Δ::Kan sec8-mNeonGreen::hphR h+</i>                                                                   | This Study |
| <b>JM508</b>  | <i>skb1Δ::kanMX6 h-</i>                                                                                                               | This Study |
| <b>JM2139</b> | <i>slf1Δ::hphR h+</i>                                                                                                                 | This Study |
| <b>JM6224</b> | <i>rga4Δ::kanMX6 rga6Δ::kanMX6 h-</i>                                                                                                 | This Study |
| <b>JM6225</b> | <i>rga4Δ::kanMX6 rga6Δ::kanMX6 skb1Δ::natR</i>                                                                                        | This Study |
| <b>JM6465</b> | <i>slf1Δ::hphR rga4Δ::kanMX6 rga6Δ::kanMX6</i>                                                                                        | This Study |
| <b>JM6114</b> | <i>Pslf1-mCherry-slf1::kanMX6 rga4-mNeonGreen::hphR h-</i>                                                                            | This Study |
| <b>JM6124</b> | <i>Pslf1-mCherry-slf1::kanMX6 rga6-GFP::kanMX6 h+</i>                                                                                 | This Study |
| <b>JM7116</b> | <i>psy1Δ::kanMX6 pDC99[Ppsy1-GFP-psy1-Tpsy1]::ura+</i>                                                                                | This Study |
| <b>JM7046</b> | <i>mCherry-slf1::kanMX6 pDC99[Ppsy1-GFP-psy1ΔHabc-Tpsy1]::ura+ h+</i>                                                                 | This Study |
| <b>JM7044</b> | <i>mCherry-slf1::kanMX6 pDC99[Ppsy1-GFP-psy1ΔSNARE-Tpsy1]::ura+ h-</i>                                                                | This Study |
| <b>JM7045</b> | <i>mCherry-slf1::kanMX6 pDC99[Ppsy1-GFP-psy1ΔMA-Tpsy1]::ura+ h-</i>                                                                   | This Study |
| <b>JM7276</b> | <i>psy1Δ::kanMX6 pDC99[Ppsy1-GFP-psy1(51QEID54→51GGGG54)-Tpsy1]::ura+</i>                                                             | This Study |
| <b>JM7359</b> | <i>psy1Δ::kanMX6 pDC99[Ppsy1-GFP-psy1(91MQLPPD96→91GGGGSG96)-Tpsy1]::Ura+</i>                                                         | This Study |
| <b>JM7328</b> | <i>psy1Δ::kanMX6 pDC99[Ppsy1-GFP-psy1(E20A, E23A, D26A, H27A, D30A)-Tpsy1]::Ura+ h-</i>                                               | This Study |
| <b>JM7329</b> | <i>psy1Δ::kanMX6 pDC99[Ppsy1-GFP-psy1(R33A, E36A, D37A, R41A, M44A)-Tpsy1]::Ura+</i>                                                  | This Study |
| <b>JM7360</b> | <i>psy1Δ::kanMX6 pDC99[Ppsy1-GFP-psy1(R145A, E148A, D149A, D150A, F151A)-Tpsy1]::Ura+</i>                                             | This Study |
| <b>JM7421</b> | <i>psy1Δ::kanMX6 pDC99[Ppsy1-GFP-psy1(V163A, L168A, R173A)-Tpsy1]::Ura+</i>                                                           | This Study |
| <b>JM7422</b> | <i>psy1Δ::Kan pDC99[Ppsy1-GFP-psy1(D98A, K103A, K111A, K112A, D115A)-Tpsy1]::Ura+ h-</i>                                              | This Study |
| <b>JM7423</b> | <i>psy1Δ::kanMX6 pDC99[Ppsy1-GFP-psy1(R63A, H64A, E66A, Y68A, D71A)-Tpsy1]::Ura+</i>                                                  | This Study |
| <b>JM7424</b> | <i>psy1Δ::kanMX6 pDC99[Ppsy1-GFP-psy1(R118A, H119A, L121A, K125A, R128A, R136A, R137A)-Tpsy1]::Ura+ h-</i>                            | This Study |
| <b>JM6888</b> | <i>sec8-tdTomato-kanMX6 h+</i>                                                                                                        | This Study |
| <b>JM7430</b> | <i>sec8-tdTomato-kanMX6 psy1Δ::kanMX6 pDC99[Ppsy1-GFP-psy1(E20A, E23A, D26A, H27A, D30A)-Tpsy1]::Ura+</i>                             | This Study |
| <b>JM7445</b> | <i>sec8-tdTomato-kanMX6 rga4Δ::kanMX6 rga6Δ::kanMX6 psy1Δ::kanMX6 pDC99[Ppsy1-GFP-psy1(E20A, E23A, D26A, H27A, D30A)-Tpsy1]::Ura+</i> | This Study |
| <b>JM7446</b> | <i>sec8-tdTomato-kanMX6 rga4Δ::kanMX6 rga6Δ::kanMX6</i>                                                                               | This Study |
| <b>JM6025</b> | <i>sts5-mNeonGreen::HphR ura4D-18 leu1-32</i>                                                                                         | This Study |
| <b>JM7185</b> | <i>psy1Δ::kanMX6 pDC99[Ppsy1-GFP-psy1-Tpsy1]::Ura+ Pslf1-mCherry-slf1::kanMX6</i>                                                     | This Study |

---

|               |                                                                                                                 |            |
|---------------|-----------------------------------------------------------------------------------------------------------------|------------|
| <b>JM7372</b> | <i>psy1Δ::kanMX6 pDC99[Ppsy1-GFP-psy1(E20A, E23A, D26A, H27A, D30A)-Tpsy1]::Ura+ Pslf1-mCherry-slf1::kanMX6</i> | This Study |
| <b>JM7373</b> | <i>psy1Δ::kanMX6 pDC99[Ppsy1-GFP-psy1(R33A, E36A, D37A, R41A, M44A)-Tpsy1]::Ura+ Pslf1-mCherry-slf1::kanMX6</i> | This Study |

---

**Table S2. Plasmids used in this study**

| Strain  | Genotype                                                                                    | Source                    |
|---------|---------------------------------------------------------------------------------------------|---------------------------|
| pJM210  | pRep3x                                                                                      | Lab Collection            |
| pJM482  | pREP3x-6His-skb1                                                                            | Deng <i>et al.</i> , 2013 |
| pJM1551 | pDC99-Ppsyl-GFP-psy1-Tpsy1                                                                  | This Study                |
| pJM1567 | pDC99-Ppsyl-GFP-psy1 $\Delta$ H <sub>abc</sub> ( $\Delta$ 11-170aa)-Tpsy1                   | This Study                |
| pJM1568 | pDC99-Ppsyl-GFP-psy1 $\Delta$ SNARE( $\Delta$ 180-250aa)-Tpsy1                              | This Study                |
| pJM1569 | pDC99-Ppsyl-GFP-psy1 $\Delta$ MA( $\Delta$ 252-283aa)-Tpsy1                                 | This Study                |
| pJM1591 | pDC99-Ppsyl-GFP-psy1(51QEID54 $\rightarrow$ 51GGGG54)-Tpsy1<br>Ha_Hb mutant                 | This Study                |
| pJM1599 | pDC99-Ppsyl-GFP-psy1(91MQLPPD96 $\rightarrow$ 91GGGGSG96)-Tpsy1<br>Hb_Hc mutant             | This Study                |
| pJM1597 | pDC99-Ppsyl-GFP-psy1(E20A, E23A, D26A, H27A, D30A)-Tpsy1<br>Ha-m1 mutant                    | This Study                |
| pJM1598 | pDC99-Ppsyl-GFP-psy1(R33A, E36A, D37A, R41A, M44A)-Tpsy1<br>Ha-m2 mutant                    | This Study                |
| pJM1600 | pDC99-Ppsyl-GFP-psy1(R145A, E148A, D149A, D150A, F151A)-Tpsy1<br>Habc_SNARE-m1 mutant       | This Study                |
| pJM1601 | pDC99-Ppsyl-GFP-psy1(V163A, L168A, R173A)-Tpsy1<br>Habc_SNARE-m2 mutant                     | This Study                |
| pJM1604 | pDC99-Ppsyl-GFP-psy1(R63A, H64A, E66A, Y68A, D71A)-Tpsy1<br>Hb-m1 mutant                    | This Study                |
| pJM1603 | pDC99-Ppsyl-GFP-psy1(D98A, K103A, K111A, K112A, D115A)-Tpsy1<br>Hc-m1 mutant                | This Study                |
| pJM1605 | pDC99-Ppsyl-GFP-psy1(R118A, H119A, L121A, K125A, R128A, R136A, R137A)-Tpsy1<br>Hc-m2 mutant | This Study                |
